# Supplementary material for: Effect of Therapeutic Gardening Program in Urban Gardens on the Mental Health of Children and Their Caregivers with Atopic Dermatitis
Source: MDPI journal article supplement (doi:10.3390/healthcare12090919), 2024-04-29
Supplement: s1 [file s1]

## Supplementary Tables & Figure

**Table S1.** Measurement tools used.

| Classification                   | Measurement                                                                  |
|----------------------------------|------------------------------------------------------------------------------|
| Psychosocial effect measurement  | Korean Version of Mental Health Screening Tool: Depressive Disorders (MHS:D) |
|                                  | Korean Version of Mental Health Screening Tool: Anxiety Disorders (MHS:A)    |
|                                  | Korean version of Core life activities index (CORE)                          |
|                                  | Korean version of the Satisfaction with the Life Scale (K-SWLS)              |
|                                  | Korean version of Parenting Self-Efficacy (PSE)                              |
|                                  | Korean version of Perceived Stress Scale (PSS)                               |
| Physiological effect measurement | Children's Depression Inventory (CDI)                                        |
|                                  | SCORing Atopic Dermatitis Index (SCORAD Index)                               |
|                                  | Transepidermal water loss (TEWL)                                             |

**Table S2.** Therapeutic garden program (15 sessions).

| Step                     | Session | Program theme              | Garden activities                                                                                                                                        |
|--------------------------|---------|----------------------------|----------------------------------------------------------------------------------------------------------------------------------------------------------|
| Garden for Start         | 1       | Introduction               | Orientation: Introducing myself with plants, guide to research contents and program, notices, etc.                                                       |
|                          | 2       | Setting up garden 1        | Making bed, sowing seeds, checking soil composition and Blending soil                                                                                    |
|                          | 3       | Setting up garden 2        | Introducing the plants in the garden and understanding their characteristics<br>Planting                                                                 |
| Garden for Participation | 4       | Garden design              | Planting herbs & edible plants for stress and psychological stability, creating herb garden that harmonizes with flowers, understanding companion plants |
|                          | 5       | Garden maintenance         | Learning the basics of gardening: watering, fertilizing, composting, fielding & erecting poles                                                           |
|                          | 6       | Garden design              | Making seasonal garden: Garden design & planting plan of various colors to feel the change of the season                                                 |
|                          | 7       | Garden maintenance         | Managing weeds and pests: making & spaying natural insect repellent, pesticide                                                                           |
| Garden for Experience    | 8       | Garden Utilization         | Using natural herbs: making herbal tea and herbal soap using herbs harvested from the garden                                                             |
|                          | 9       | Garden design              | Making grass & rock garden: Stimulate the sense of touch by planting plants of various textures and experience plants growing in various environments.   |
|                          | 10      | Garden Utilization         | Cottage & division: learning and practicing various plant propagation methods (unsexual propagation, sexual propagation)                                 |
|                          | 11      | Garden Cultural Activities | A family program where you spend time in the garden: making a birdhouse, bouquets, treasure hunt in the garden, etc.                                     |
| Garden for Restart       | 12      | Garden Utilization         | Harvesting summer & fall flower and gathering seed, caring for garden of next year                                                                       |
|                          | 13      | Garden Cultural Activities | Sharing the plants and collected seeds from the last program                                                                                             |
|                          | 14      | Garden maintenance         | Garden planning: Detailed planning for the next garden with gardening calendar, planting bulbs for next spring, preparing for the coming winter          |
|                          | 15      | Garden Cultural Activities | Garden party with photography exhibition                                                                                                                 |

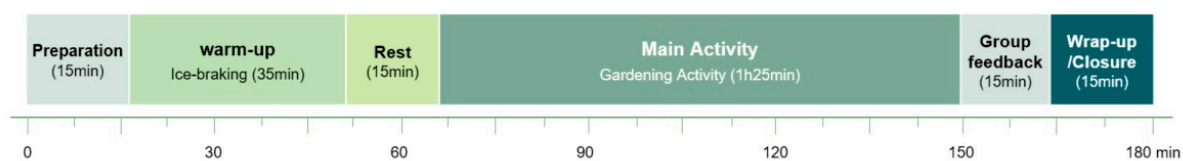

Figure S1. Timeline (in minutes) of program.

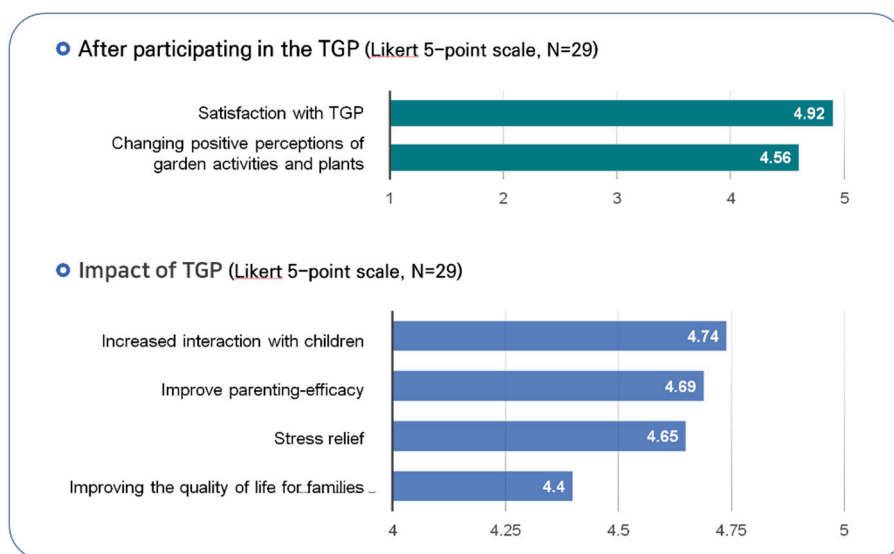

Figure S2. Result of therapeutic gardening program (TGP) satisfaction survey.
